# Supplementary material for: Ability of prebiotic polysaccharides to activate a HIF1α-antimicrobial peptide axis determines liver injury risk in zebrafish
Source: PubMed Central journal article supplement (PMC6658494; doi:10.1038/s42003-019-0526-z), 2019-07-25
Supplement: 42003_2019_526_MOESM1_ESM.pdf [file 42003_2019_526_MOESM1_ESM.pdf]

## Supplementary Information

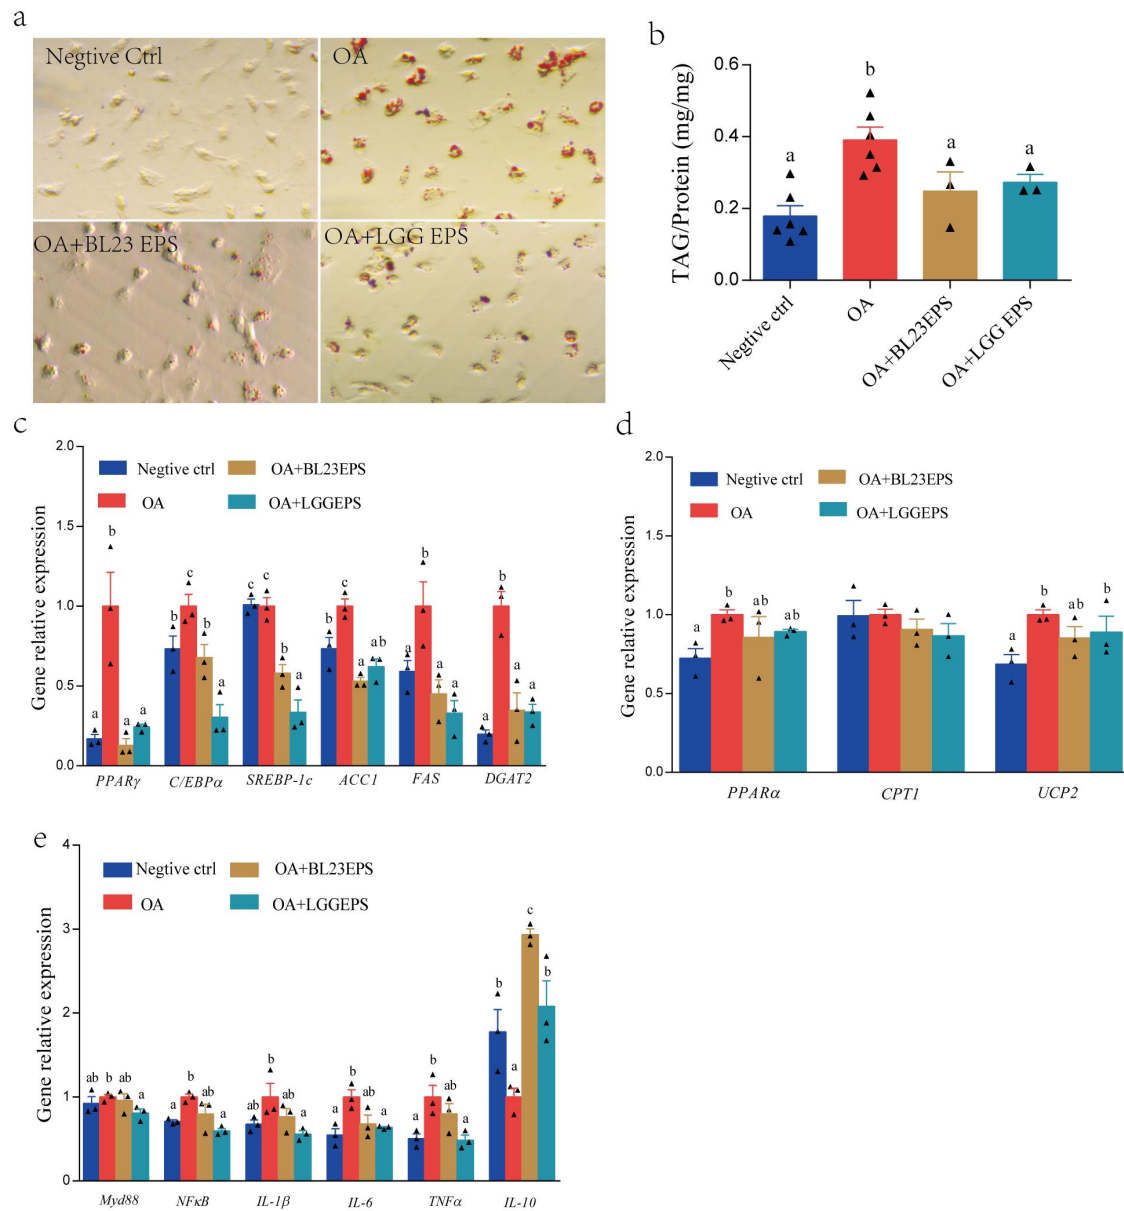

**Supplementary Figure 1. LGG EPS and BL23 EPS inhibit lipogenesis and improve inflammation status in ZFL cells.** ZFL cells were treated with 10.0  $\mu$ g/ml LGG EPS or BL23 EPS with the addition of 100  $\mu$ M oleic acid for 24h. **(a)** The profile of lipid droplet formation with Oil red O staining in ZFL. **(b)** TAG accumulation in ZFL by TAG assay ( $n = 3-6$ ). The expression of genes related to lipogenesis **(c)**, energy expenditure **(d)**, and inflammation **(e)** in ZFL as measured by  $q$ -PCR ( $n = 3$ ). Data are expressed as the mean  $\pm$  SEM. Graph bars in **b–e** labelled with different letters on top represent statistically significant results ( $P < 0.05$ ), whereas bars with the same letter correspond to results that show no statistically significant differences.

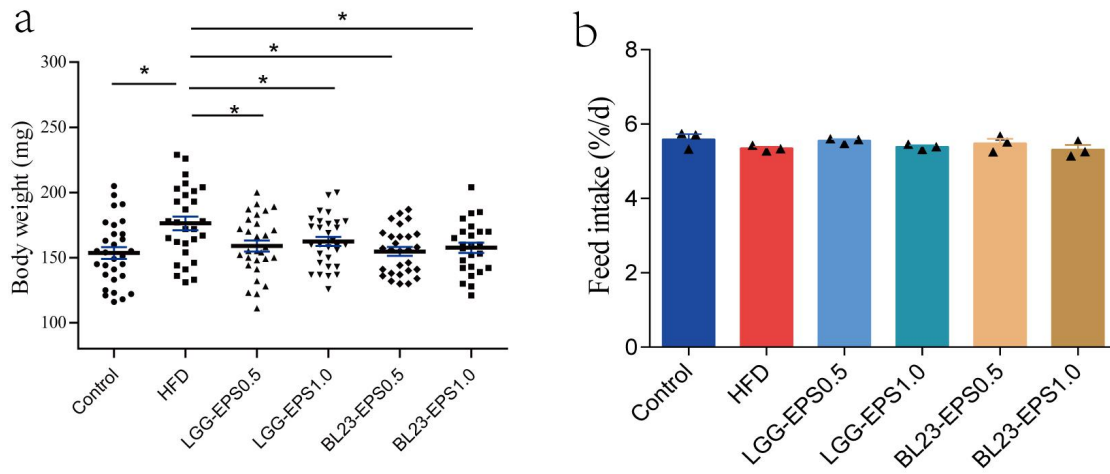

**Supplementary Figure 2. The effects of EPS administration on the growth performance in HFD-fed zebrafish.** Adult zebrafish (one-month-old) were fed with the control diet, HF diet, or HF diet supplemented with 0.5% or 1% EPS for four weeks. **(a)** The body weight of adult zebrafish fed on different diets for four weeks. **(b)** Food intake of adult zebrafish fed on different diets for four weeks. Data were expressed as the mean  $\pm$  SEM. Differences are considered significant at  $P < 0.05$  (\*) and  $P < 0.01$  (\*\*).

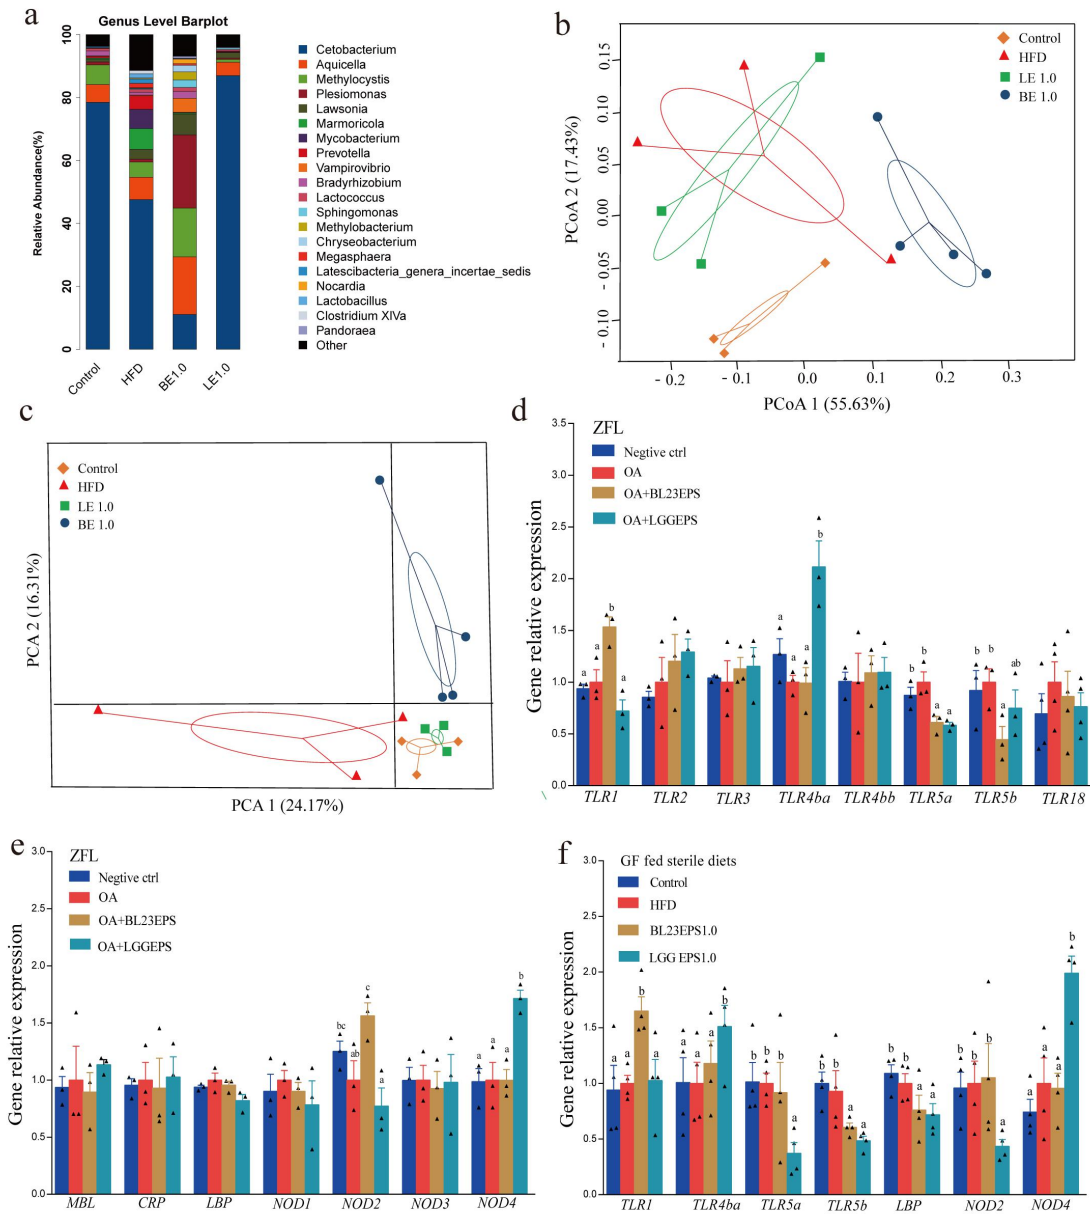

**Supplementary Figure 3. The liver damage effect of BL23 EPS is mediated by the gut microbial dysbiosis.** (a) The relative bacterial abundance at the level of genus of the microbiota of adult zebrafish fed with diets for four weeks. (b) The weighted version of UniFrac-based PCoA of the microbiotas of adult zebrafish fed with diets for four weeks. (c) Principle component analyses (PCA) of the genera with different abundance among zebrafish fed with different diets for four weeks. The expression of transmembrane PRRs (*TLRs*) genes (d), secreted PRRs (*MBL*, *CRP*, *LBP*) genes, and cytosolic PRRs (*NODs*) genes (e) in ZFL cells treated with LGG EPS or BL23 EPS for 24h. (f) The expression of pattern recognition receptor (PRR) genes in GF larvae colonized with four different gut microbiotas, and fed sterile HFD diets for seven days (n = 4, pool of 20 larvae per sample). Data are expressed as the mean  $\pm$  SEM. Graph bars labeled with different letters on top represent statistically significant results ( $P < 0.05$ ), whereas bars with the same letter corresponds to results that show no statistically significant differences.

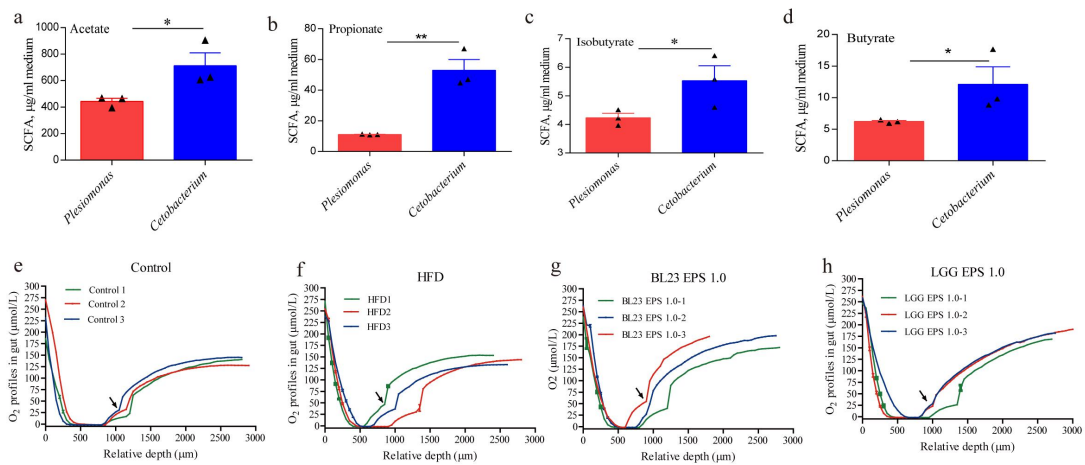

**Supplementary Figure 4. Butyrate mediated the further differentiation of the LGG EPS-and BL23 EPS-associated microbiota.** Acetate levels (a), propionate levels (b), isobutyrate levels (c), butyrate levels (d) produced by equal CFU of *Cetobacterium* and *Plesiomonas* which were cultured in GAM (Gifu Anaerobic Medium) medium, and were incubated at 28°C for 12h under anaerobic conditions (n = 3). Profiles of O<sub>2</sub> concentration in gut for (e) Control, (f) HFD, (g) 1.0% BL23 EPS and (h) 1.0% LGG EPS groups. The relative depth refers the position relative to initial starting location. The points of inflection of oxygen profiles (the solid arrowheads) indicate the O<sub>2</sub> concentration in the intestinal mucosa layer (Fig. 9e) as described by Zeitouni *et al.* The figure shows the oxygen profiles of three different zebrafish midguts. Data were expressed as the mean ± SEM. Differences are considered significant at  $P < 0.05$  (\*) and  $P < 0.01$  (\*\*). (Zeitouni NE, Chotikatum S, von Köckritz-Blickwede M, Naim HY. (2016) The impact of hypoxia on intestinal epithelial cell functions: consequences for invasion by bacterial pathogens. *Molecular and cellular pediatrics* 3: 14.)

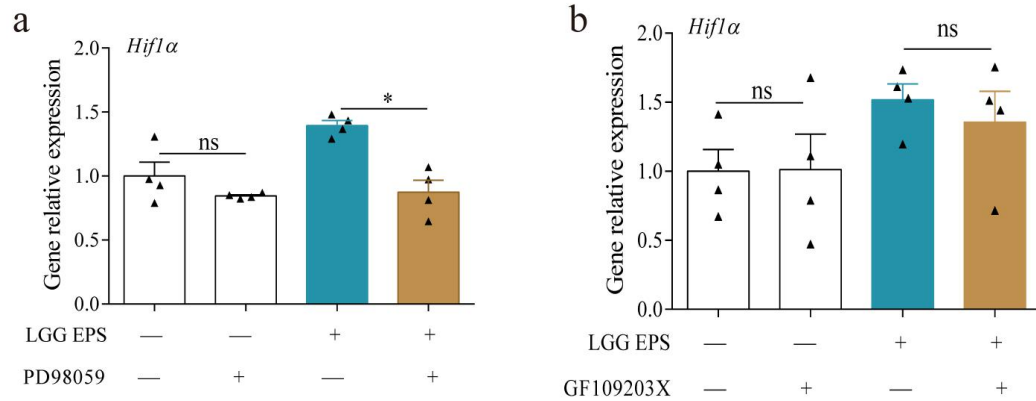

**Supplementary Figure 5. Implication of the p44/42 MAPK and PKC pathways in HIF-1 induction by LGG EPS.** GF zebrafish were pretreated or not for 1h with PD 98059 (50  $\mu$ M) or GF109203X (10  $\mu$ M) and maintained under control conditions in the presence of 10  $\mu$ g/mL LGG EPS for 6 hours. The expression of *Hif-1 $\alpha$*  (**a**, **b**) in the GF zebrafish treated with PD 98059 or GF109203X.

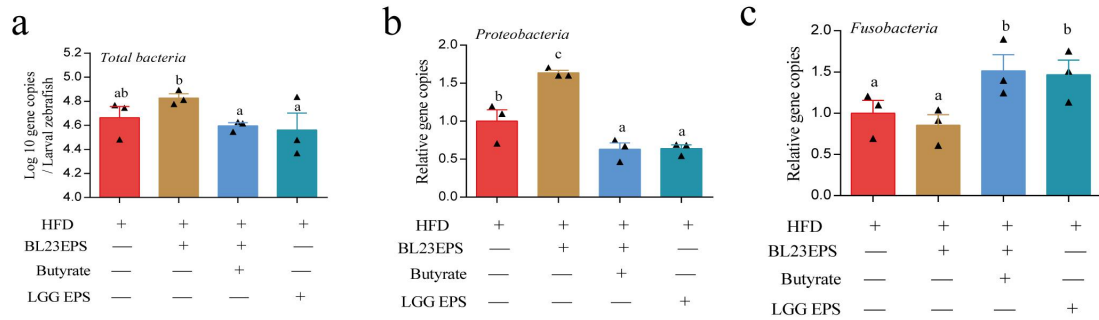

**Supplementary Figure 6. The approaches to control the risks.** Zebrafish larvae fed HFD, and HF diet supplemented with 1.0% BL23 EPS, 1.0% BL23 EPS plus 0.1% tributyrin, or 1.0% LGG EPS for one week. The total bacteria **(a)** and the relative bacterial abundance of Phylum *Proteobacteria* **(b)**, and Phylum *Fusobacteria* **(c)** of the microbiota of zebrafish larvae (n = 3, pool of 20 larvae per sample). Data are expressed as the mean ± SEM. Graph bars labelled with different letters on top represent statistically significant results ( $P < 0.05$ ), whereas bars with the same letter correspond to results that show no statistically significant differences.

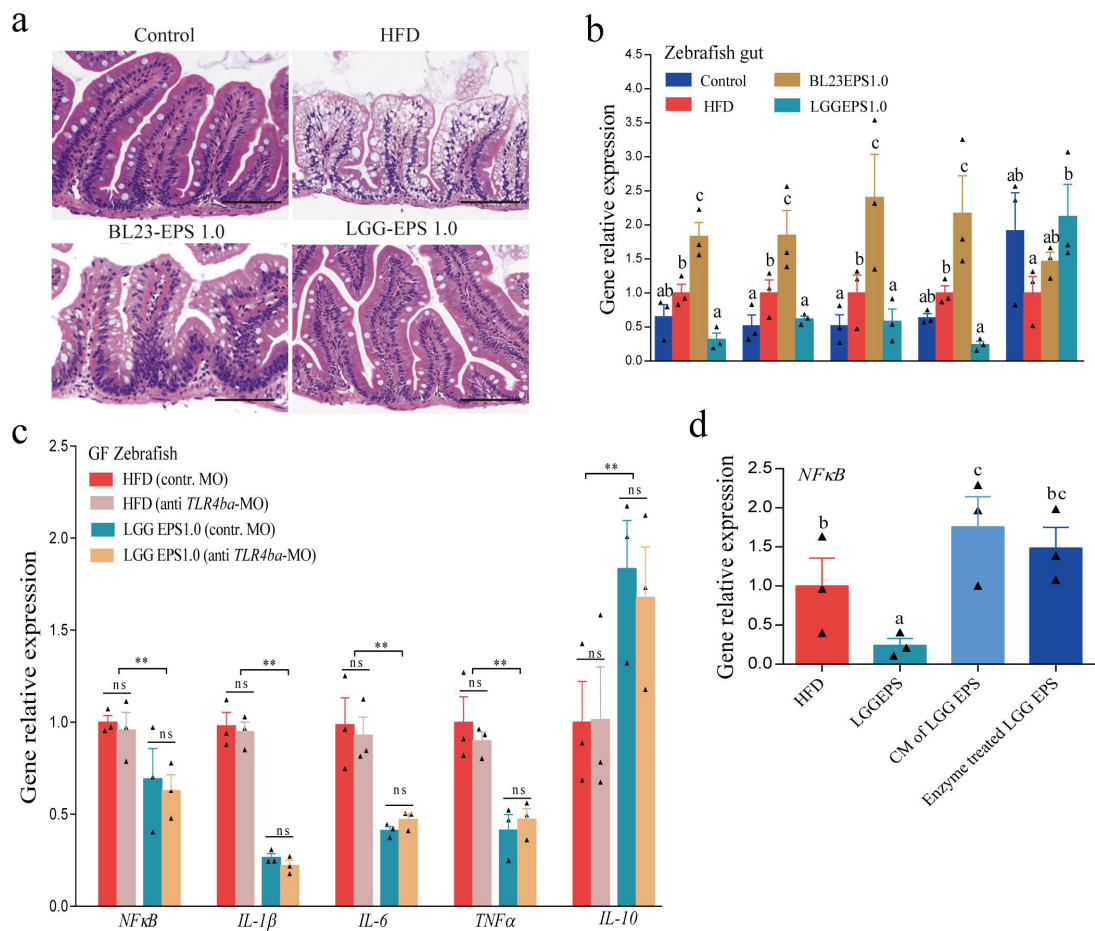

**Supplementary Figure 7. BL23 EPS induced intestinal inflammation while LGG EPS showed protective effect.** Adult zebrafish (one month old) were fed with the control diet, HF diet, or HF diet supplemented with 1.0% BL23 EPS or 1.0% LGG EPS for four weeks. **(a)** Representative intestines histology images by H&E staining. The scale bar is 50  $\mu\text{m}$ . **(b)** The expression of genes related to inflammation in the intestines as measured by *q*-PCR ( $n = 3$ , pool of 3 zebrafish per sample). The expression of genes related in inflammatory **(c)** in GF larvae fed sterile HFD or 1.0% LGG EPS diet and treated with *vivo* *TLR4ba* morpholino or control morpholino ( $n = 3$ , pool of 20 larvae per sample). The expression of *NFκB* **(d)**, in the GF zebrafish fed with HFD, 1.0% LGG EPS diet, HF diet supplemented with 1.0% combination of monosaccharides comprised of LGG EPS or  $\beta$ -Galactosidase treated LGG EPS for one week ( $n = 3$ , pool of 20 larvae per sample). Data are expressed as the mean  $\pm$  SEM. Graph bars labelled with different letters on top represent statistically significant results ( $P < 0.05$ ), whereas bars with the same letter correspond to results that show no statistically significant differences.

**Supplementary Table 1. Ingredients and chemical compositions of diets for 1-month-old zebrafish (dry matter, g/kg diet).**

| Ingredient (g/kg diet)      | Control diet | High-fat diet | 0.5% EPS | 0.5% EPS | 1.0% EPS |
|-----------------------------|--------------|---------------|----------|----------|----------|
| Casein                      | 400          | 400           | 400      |          | 400      |
| Gelatin                     | 100          | 100           | 100      |          | 100      |
| Dextrin                     | 350          | 250           | 250      |          | 250      |
| Lard oil                    | 0.00         | 80            | 80       |          | 80       |
| Soybean oil                 | 60           | 80            | 80       |          | 80       |
| Lysine                      | 3.3          | 3.3           | 3.3      |          | 3.3      |
| VC phosphate                | 1.0          | 1.0           | 1.0      |          | 1.0      |
| Vitamin premix <sup>1</sup> | 2.0          | 2.0           | 2.0      |          | 2.0      |
| Mineral premix <sup>2</sup> | 2.0          | 2.0           | 2.0      |          | 2.0      |
| Monocalcium phosphate       | 20           | 20            | 20       |          | 20       |
| Choline chloride            | 2.0          | 2.0           | 2.0      |          | 2.0      |
| Sodium alginate             | 20           | 20            | 20       |          | 20       |
| Zeolite                     | 39.7         | 39.7          | 34.7     |          | 29.7     |
| EPS                         | 0.00         | 0.00          | 5.0      |          | 10.0     |
| Total                       | 1000         | 1000          | 1000     |          | 1000     |
| Proximate analysis          |              |               |          |          |          |
| Crude protein               | 42.19        | 42.19         | 42.19    |          | 42.19    |
| Crude lipid                 | 6.09         | 15.77         | 15.77    |          | 15.77    |
| Gross energy (KJ/g DM)      | 18.55        | 20.85         | 20.85    |          | 20.85    |

1. Containing the following (g/kg vitamin premix): thiamine, 0.438; riboflavin, 0.632; pyridoxine·HCl, 0.908; *d*-pantothenic acid, 1.724; nicotinic acid, 4.583; biotin, 0.211; folic acid, 0.549; vitamin B-12, 0.001; inositol, 21.053; menadione sodium bisulfite, 0.889; retinyl acetate, 0.677; cholecalciferol, 0.116; *dl*- $\alpha$ -tocopherol-acetate, 12.632.

2. Containing the following (g/kg mineral premix): CoCl<sub>2</sub>·6H<sub>2</sub>O, 0.074; CuSO<sub>4</sub>·5H<sub>2</sub>O, 2.5; FeSO<sub>4</sub>·7H<sub>2</sub>O, 73.2; NaCl, 40.0; MgSO<sub>4</sub>·7H<sub>2</sub>O, 284.0; MnSO<sub>4</sub>·H<sub>2</sub>O, 6.50; KI, 0.68; Na<sub>2</sub>SeO<sub>3</sub>, 0.10; ZnSO<sub>4</sub>·7H<sub>2</sub>O, 131.93; Cellulose, 501.09.



**Supplementary Table 2. Ingredients and chemical compositions of diets for larval zebrafish (dry matter, g/kg diet).**

| Ingredient (g/kg diet)      | Control diet | High-fat diet | 0.5% EPS | 1% EPS |
|-----------------------------|--------------|---------------|----------|--------|
| Casein                      | 460          | 460           | 460      | 460    |
| Gelatin                     | 110          | 110           | 110      | 110    |
| Dextrin                     | 180          | 120           | 120      | 120    |
| Lard oil                    | 30           | 90            | 90       | 90     |
| Soybean oil                 | 30           | 90            | 90       | 90     |
| Fish liver oil              | 20           | 20            | 20       | 20     |
| Soybean lecithin            | 20           | 20            | 20       | 20     |
| Lysine                      | 1.8          | 1.8           | 1.8      | 1.8    |
| VC phosphate                | 1.0          | 1.0           | 1.0      | 1.0    |
| Vitamin premix <sup>1</sup> | 2.0          | 2.0           | 2.0      | 2.0    |
| Mineral premix <sup>2</sup> | 2.0          | 2.0           | 2.0      | 2.0    |
| Monocalcium phosphate       | 20           | 20            | 20       | 20     |
| Choline chloride            | 2.0          | 2.0           | 2.0      | 2.0    |
| Sodium alginate             | 20           | 20            | 20       | 20     |
| Zeolite                     | 101.2        | 41.2          | 36.2     | 31.2   |
| EPS                         | 0.00         | 0.00          | 5.0      | 10     |
| Total                       | 1000         | 1000          | 1000     | 1000   |
| Proximate analysis          |              |               |          |        |
| Crude protein               | 48.09        | 48.09         | 48.09    | 48.09  |
| Crude lipid                 | 9.90         | 21.66         | 21.66    | 21.66  |
| Gross energy (KJ/g DM)      | 18.60        | 22.23         | 22.23    | 22.23  |

1. Containing the following (g/kg vitamin premix): thiamine, 0.438; riboflavin, 0.632; pyridoxine·HCl, 0.908; *d*-pantothenic acid, 1.724; nicotinic acid, 4.583; biotin, 0.211; folic acid, 0.549; vitamin B-12, 0.001; inositol, 21.053; menadione sodium bisulfite, 0.889; retinyl acetate, 0.677; cholecalciferol, 0.116; *dl*- $\alpha$ -tocopherol-acetate, 12.632.

2. Containing the following (g/kg mineral premix): CoCl<sub>2</sub>·6H<sub>2</sub>O, 0.074; CuSO<sub>4</sub>·5H<sub>2</sub>O, 2.5; FeSO<sub>4</sub>·7H<sub>2</sub>O, 73.2; NaCl, 40.0; MgSO<sub>4</sub>·7H<sub>2</sub>O, 284.0; MnSO<sub>4</sub>·H<sub>2</sub>O, 6.50; KI, 0.68; Na<sub>2</sub>SeO<sub>3</sub>, 0.10; ZnSO<sub>4</sub>·7H<sub>2</sub>O, 131.93; Cellulose, 501.09.

**Supplementary Table 3. Diversity index of gut bacteria of zebrafish fed with control, HFD, BL23 EPS or LGG EPS-supplemented diet for four weeks<sup>1</sup>.**

| Sample      | OTUs                      | Chao1                     | PD whole tree           | Simpson                  | Shannon                |
|-------------|---------------------------|---------------------------|-------------------------|--------------------------|------------------------|
| Control     | 164.3 ± 18.8 <sup>b</sup> | 157.9 ± 13.6 <sup>b</sup> | 15.9 ± 1.5 <sup>b</sup> | 0.67 ± 0.03 <sup>b</sup> | 2.7 ± 0.3 <sup>b</sup> |
| HFD         | 220.3 ± 28.2 <sup>c</sup> | 249.3 ± 25.6 <sup>c</sup> | 19.6 ± 2.3 <sup>c</sup> | 0.84 ± 0.03 <sup>c</sup> | 3.9 ± 0.3 <sup>c</sup> |
| BL23EPS 1.0 | 140.5±20.8 <sup>ab</sup>  | 137.9±20.5 <sup>ab</sup>  | 14.3±1.5 <sup>ab</sup>  | 0.90±0.01 <sup>c</sup>   | 4.2 ± 0.1 <sup>c</sup> |
| LGGEPS 1.0  | 93.0 ± 21.6 <sup>a</sup>  | 86.3± 22.7 <sup>a</sup>   | 9.1 ± 2.6 <sup>a</sup>  | 0.50 ± 0.10 <sup>a</sup> | 1.6 ± 0.4 <sup>a</sup> |

<sup>1</sup>Values are expressed as the mean ± SEM, n = 3 or 4. Chao1, Chao1 index; OTU, operational taxonomic unit; PD, phylogenetic diversity; Simpson, Simpson's diversity index; Shannon, Shannon diversity index. Means marked with different letters represent statistically significant results ( $P < 0.05$ ), whereas the same letter correspond to results that show no statistically significant differences.

**Supplementary Table 4. The predominant gut bacterial phyla in zebrafish fed with control, HFD, BL23 EPS or LGG EPS-supplemented diet for four weeks<sup>1</sup>.**

| Phylum (%)            | Control                   | HFD                      | BL23EPS 1.0           | LGG EPS 1.0               |
|-----------------------|---------------------------|--------------------------|-----------------------|---------------------------|
| <i>Fusobacteria</i>   | 42.7 ± 8.6 <sup>c</sup>   | 28.3 ± 6.6 <sup>b</sup>  | 8.2±4.6 <sup>a</sup>  | 44.4 ± 13.8 <sup>c</sup>  |
| <i>Proteobacteria</i> | 49.9 ± 10.5 <sup>ab</sup> | 43.6 ± 15.5 <sup>a</sup> | 79.1±2.9 <sup>b</sup> | 53.2 ± 14.4 <sup>ab</sup> |
| <i>Actinobacteria</i> | 4.5 ± 1.8 <sup>a</sup>    | 11.7 ± 3.9 <sup>b</sup>  | 6.8±1.7 <sup>ab</sup> | 0.7 ± 0.4 <sup>a</sup>    |
| <i>Firmicutes</i>     | 1.5 ± 0.4 <sup>a</sup>    | 8.1 ± 3.8 <sup>b</sup>   | 2.7±0.6 <sup>a</sup>  | 1.2 ± 0.4 <sup>a</sup>    |
| <i>Bacteroidetes</i>  | 0.6 ± 0.2 <sup>a</sup>    | 5.5 ± 3.1 <sup>b</sup>   | 2.5±1.0 <sup>ab</sup> | 0.4 ± 0.2 <sup>a</sup>    |
| Sum (%)               | 99.0 ± 0.5                | 97.3 ± 1.8               | 99.1±0.2              | 99.9 ± 0.1                |

<sup>1</sup>Values are expressed as the mean ± SEM, n = 3 or 4. Means marked with different letters represent statistically significant results ( $P < 0.05$ ), whereas the same letter correspond to results that show no statistically significant differences.

**Supplementary Table 5. The predominant gut bacterial genera in zebrafish fed with control, HFD, or LGG EPS-supplemented diet for four weeks<sup>1</sup>.**

| Genus (%)            | Control                  | HFD                     | BL23EPS 1.0            | LGG EPS 1.0              |
|----------------------|--------------------------|-------------------------|------------------------|--------------------------|
| <i>Cetobacterium</i> | 78.5 ± 3.0 <sup>c</sup>  | 47.6 ± 4.0 <sup>b</sup> | 11.1±6.2 <sup>a</sup>  | 86.9 ± 4.0 <sup>c</sup>  |
| <i>Plesiomonas</i>   | 1.0 ± 0.5 <sup>a</sup>   | 1.0 ± 0.4 <sup>a</sup>  | 23.3±7.3 <sup>b</sup>  | 0.5 ± 0.3 <sup>a</sup>   |
| <i>Aquicella</i>     | 5.7 ± 1.3 <sup>ab</sup>  | 7.1 ± 3.9 <sup>ab</sup> | 18.3±7.5 <sup>b</sup>  | 4.3 ± 2.3 <sup>a</sup>   |
| <i>Methylocystis</i> | 6.2 ± 2.1 <sup>ab</sup>  | 4.8 ± 3.6 <sup>ab</sup> | 15.5±6.5 <sup>b</sup>  | 0.90 ± 0.4 <sup>a</sup>  |
| <i>Lawsonia</i>      | 0.80 ± 0.3 <sup>a</sup>  | 3.1 ± 1.4 <sup>ab</sup> | 6.7±1.5 <sup>b</sup>   | 1.7 ± 0.6 <sup>a</sup>   |
| <i>Marmoricola</i>   | 0.43 ± 0.41 <sup>a</sup> | 6.6 ± 2.1 <sup>b</sup>  | 0.32±0.22 <sup>a</sup> | 0.07 ± 0.03 <sup>a</sup> |
| <i>Mycobacterium</i> | 0.10 ± 0.02 <sup>a</sup> | 6.1 ± 4.4 <sup>b</sup>  | 0.02±0.01 <sup>a</sup> | 0.05 ± 0.01 <sup>a</sup> |
| <i>Prevotella</i>    | 0.57 ± 0.30 <sup>a</sup> | 4.3 ± 2.4 <sup>b</sup>  | 0.10±0.05 <sup>a</sup> | 0.17 ± 0.09 <sup>a</sup> |

<sup>1</sup>Values are expressed as the mean ± SEM, n = 3 or 4. Means marked with different letters represent statistically significant results ( $P < 0.05$ ), whereas the same letter corresponds to results that show no statistically significant differences.

**Supporting Information Table 6. Sequences of primers used for q-PCR analysis.**

| Gene Name                | Forward (5'→3')       | Reverse (5'→3')        |
|--------------------------|-----------------------|------------------------|
| <i>β-actin</i>           | GGTACCCATCTCCTGCTCCAA | GAGCGTGGCTACTCCTTCACC  |
| (Reference gene)         |                       |                        |
| <i>rps11</i>             | ACAGAAATGCCCTTCACTG   | GCCTCTTCTCAAAACGGTTG   |
| (Reference gene)         |                       |                        |
| <i>FAS</i>               | GGAGCAGGCTGCCTCTGTGC  | TTGCGGCCTGTCCACTCCT    |
| <i>PPAR<sub>γ</sub></i>  | CCTGTCCGGGAAGACCAGCG  | GTGCTCGTGGAGCGGCATGT   |
| <i>C/EBP<sub>α</sub></i> | AACGGAGCGAGCTTGACTT   | AAATCATGCCATTAGCTGC    |
| <i>PPAR<sub>α</sub></i>  | CTGCGGGACATCTCTCAGTC  | ACCGTAAACACCTGACGACG   |
| <i>CPT1</i>              | GCATTGACCTTCAGCTCAGC  | CTGCCAACACCAGCACGAAC   |
| <i>UCP2</i>              | TGCCACCGTGAAGTTTATTG  | CCTCGATATTCACCGGACC    |
| <i>SCD1</i>              | TTGCACTGCGTCCCGATGCC  | GGCTCGTCGTCGGCAACCTC   |
| <i>ACC1</i>              | GCGTGGCCGAACAATGGCAG  | GCAGGTCCAGCTTCCTGCG    |
| <i>DGAT2</i>             | CCATACTTGCTGCATATTCC  | ATGTCATGATAAACTGCAGC   |
| <i>SREBP-1c</i>          | CAGAGGGTGGGCATGCTGGC  | ATGTGACGGTGGTGCCGCTG   |
| <i>TNF<sub>α</sub></i>   | AAGGAGAGTTGCCTTTACCG  | ATTGCCCTGGGTCTTATGG    |
| <i>IL-6</i>              | TCAACTTCTCCAGCGTGATG  | TCTTCCCTCTTTTCTCCTG    |
| <i>IL-10</i>             | TCACGTCATGAACGAGATCC  | CCTCTTGCAATTCACCATATCC |
| <i>NFκB</i>              | GCAAGATGAGAACGGAGACAC | CTACCAGCAATCGCAAACAA   |
| <i>IL-1β</i>             | GGCTGTGTGTTTGGGAATCT  | TGATAAACCAACCGGGACA    |
| <i>TLR1</i>              | CAGAGCGAATGGTGCCACTAT | GTGGCAGAGGCTCCAGAAGA   |
| <i>TLR2</i>              | ATACAAGCCAAACGGAAACCT | CTTCTCACATTTCCGCATCAT  |
| <i>TLR3</i>              | AAAGGGCTACGTTTGGTGTG  | GCATCCTTCAGCGACCCTAA   |

---

|                   |                          |                               |
|-------------------|--------------------------|-------------------------------|
| <i>TLR4ba</i>     | TGTCAAGATGCCACATCAGA     | TCCACAAGAACAAGCCTTTG          |
| <i>TLR4bb</i>     | TGGTGATGAAGAGTCCCTTTCCTA | TCTGCGTGCCAGTAAAAGATCTCA      |
| <i>TLR5a</i>      | CATTCTGGTGGTGCTTGTT      | CTGCTGCTCAGGATTGTT            |
| <i>TLR5b</i>      | GTGAGGAGCCTGATCCTGATAG   | CATACTAAATGTATAATAAGTCTACCATG |
| <i>TLR18</i>      | TTTAGGTCAAGGGGTGGATTAC   | CTACTATGTCGGCTGATTGTTCTC      |
| <i>Claudin</i>    | TGTTCATCACTGGAGGGCTT     | GGAGGATACGAGGGTTTTTC          |
| <i>Claudin-7</i>  | CTTGCTCAAAGGGTCAGTCA     | GTCCTTCCAGCTCGTGAAC           |
| <i>Occludin-2</i> | TGGAGATGAGCTTGACACAGATG  | CCTTCCTCTAGCCTGTCGAG          |
| <i>Occludin-B</i> | CAAAATCAGGCAAAGGCTTC     | AACAATAGTGGCGATGAGCA          |
| <i>Hif-1aa</i>    | AGCCGCCACACTTTAGACAT     | CCTCTGGATCAAAACCCAAG          |
| <i>Hif-1ab</i>    | GCCACACTCTGGACATGAAG     | TCAAGAGGTCATCTGGCTCA          |
| <i>Hif-2a</i>     | GAGAGCTGTGCAGTCATGGA     | GTCGGTTGTCCGTTCTGATT          |
| <i>Arat1a</i>     | TCTCCTGGGGGAAAGAAGAT     | CCATCGCTGCTTCATCATT           |
| <i>Arat1b</i>     | CTCGCTGAATGCCATAGACA     | CCCGAGACGACTGTATTGGT          |
| <i>Noxa</i>       | AAGAGCAAACCGCTGTAGTAGA   | CATCGCTTCCCCTCCATT            |
| <i>Puma</i>       | GAGGAGCAGGCTGTGGAG       | GTAGAGGGCATTGATGGTGTC         |
| <i>Mcl1a</i>      | AACTCCATCACGCCATACC      | TCTGCTCAGCCACCCTCT            |
| <i>Mcl1b</i>      | TACCGTCCTCGCCTTCG        | TGTCCACAACCCGCCTC             |
| <i>MBL</i>        | GTGAGGATGAGAATAAAGTGCT   | GTTAGTGAAAGTTAGAGGCTGG        |
| <i>CRP</i>        | TCGATAGGGAGGTCATCCTG     | GCAGCAGGGTCTTTCTGACT          |
| <i>LBP</i>        | GGGACCTATTATGCCCTCT      | AGGCATTTGTAGCTCTGCACT         |
| <i>NOD1</i>       | CAGACCAGGTACGCAAATCTTG   | TGAAATACGCCGAGCATTCC          |
| <i>NOD2</i>       | GTTATGGTGGGCAAGGACAGA    | CATTGGCCTGTCAGCCAGTA          |
| <i>NOD3</i>       | CAACATACACACACCCGCCTT    | TCGTGGCGTAGTTCTTCTTG          |

---

---

|                                   |                           |                           |
|-----------------------------------|---------------------------|---------------------------|
| <i>NOD4</i>                       | GTTGGCATTCTCAGTCGGTTCA    | ATCAGTCTTGGTAGTCCATCGGGTT |
| <i>Muc2.1</i>                     | AATATGCCTTGCGGAACAAC      | GTGCTGAGGTTGCAGAATGA      |
| <i>Lysozyme</i>                   | GATTTGAGGGATTCTCCATTGG    | CCGTAGTCCTTCCCCGTATCA     |
| <i>c3b</i>                        | CGTCTCCGTACACCATCCATT     | GGCGTCTCATCAGGATTTGTTAC   |
| <i>Hepcidin</i>                   | CACAGCCGTTCCCTTCATAC      | AGTATCCGCAGCCTTTATTG      |
| <i>Defbl1</i>                     | AGGATGCAGCCTCATTCTCTTT    | TGAAGCCCCAGAGCATATTTATC   |
| <i>Defbl2</i>                     | CAATAACACGTCCAATGAAGAGTCT | GGTTTGGGATAGACGACATGAGT   |
| <i>Universal bacteria</i>         | CCTACGGGAGGCAGCAG         | ATTACCGCGGCTGCTGG         |
| <i>Fusobacterium</i><br>(phylum)  | KGGGCTCAACMCMGTATTGCGT    | TCGCGTTAGCTTGGGCGCTG      |
| <i>Proteobacteria</i><br>(phylum) | TCGTCAGCTCGTGTYGTGA       | CGTAAGGGCCATGATG          |
| <i>Cetobacterium</i> (genus)      | AGTTTGATCCTGGCTCAGGATG    | GAGGCAAGTTCCTTACGCGTT     |
| <i>Plesiomonas</i> (genus)        | CTCCGAATACCGTAGAGTGCTATCC | CTCCCCTAGCCCAATAACACCTAAA |

---
